# Supplementary material for: Translational Results of Zo-NAnTax: A Phase II Trial of Neoadjuvant Zoledronic Acid in HER2-Positive Breast Cancer
Source: MDPI journal article supplement (doi:10.3390/ijms232415515), 2022-12-08
Supplement: s1 [file s1]

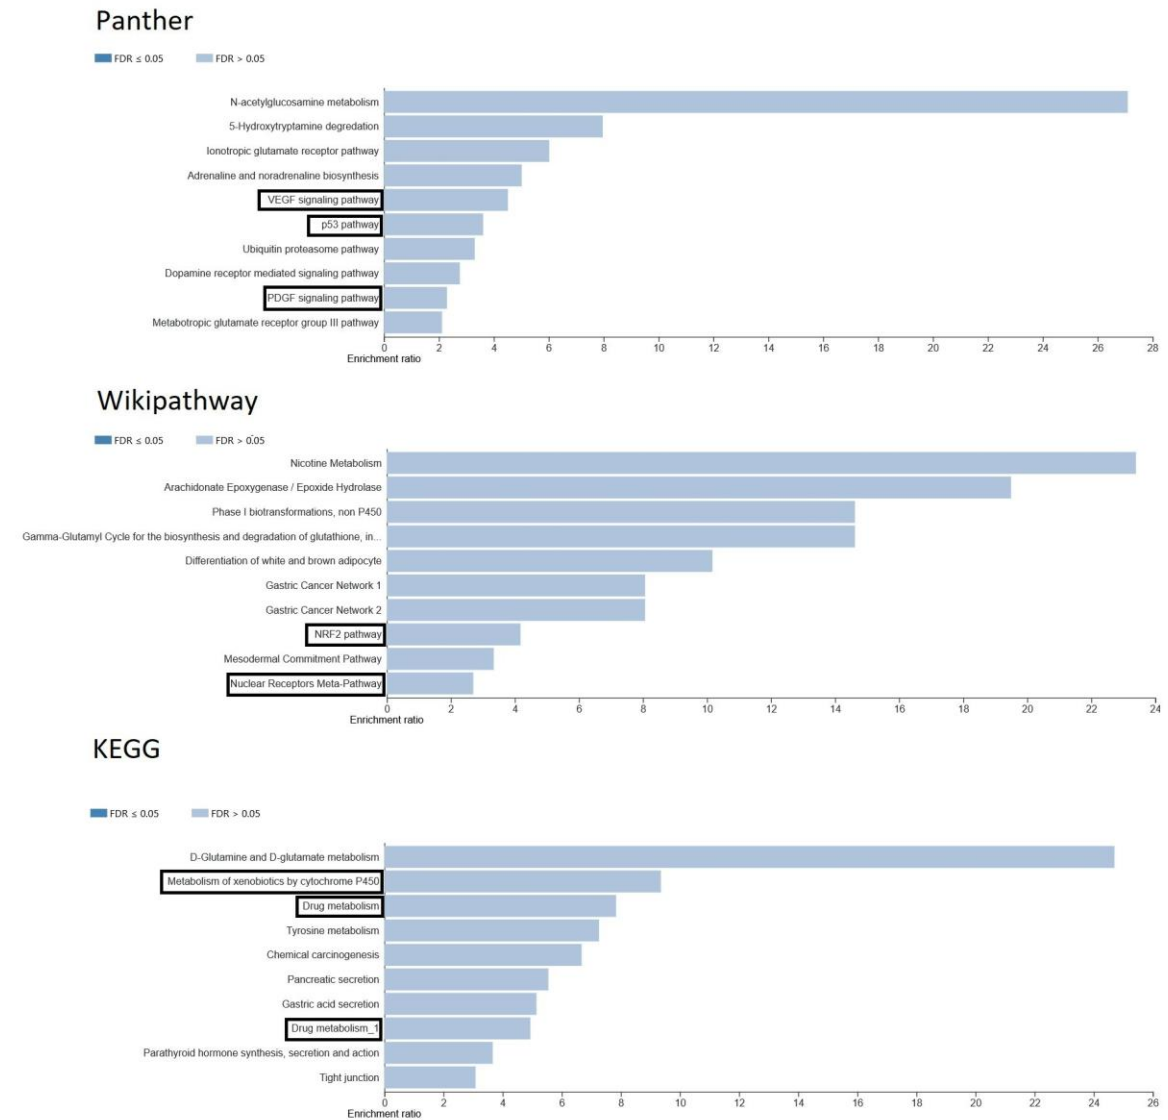

**Figure S1.** Top 10 signaling pathways related to the differentially expressed genes using Panther, Wikipathway, and KEGG databases. Black boxes indicate the most relevant pathways.

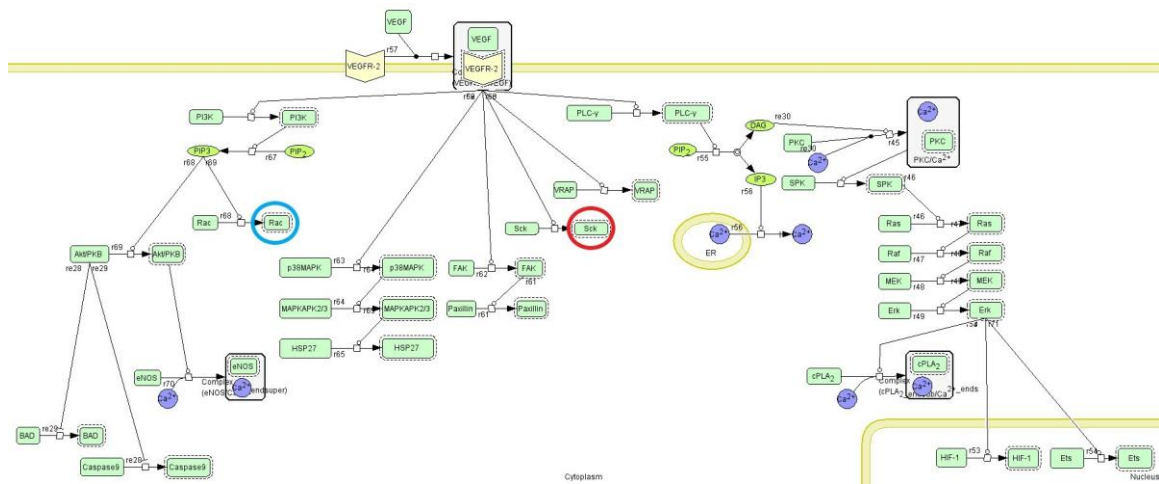

**Figure S2.** VEGF signaling pathway (Panther gene set: P00056). Upregulated genes are marked with red circles and downregulated genes with blue circles

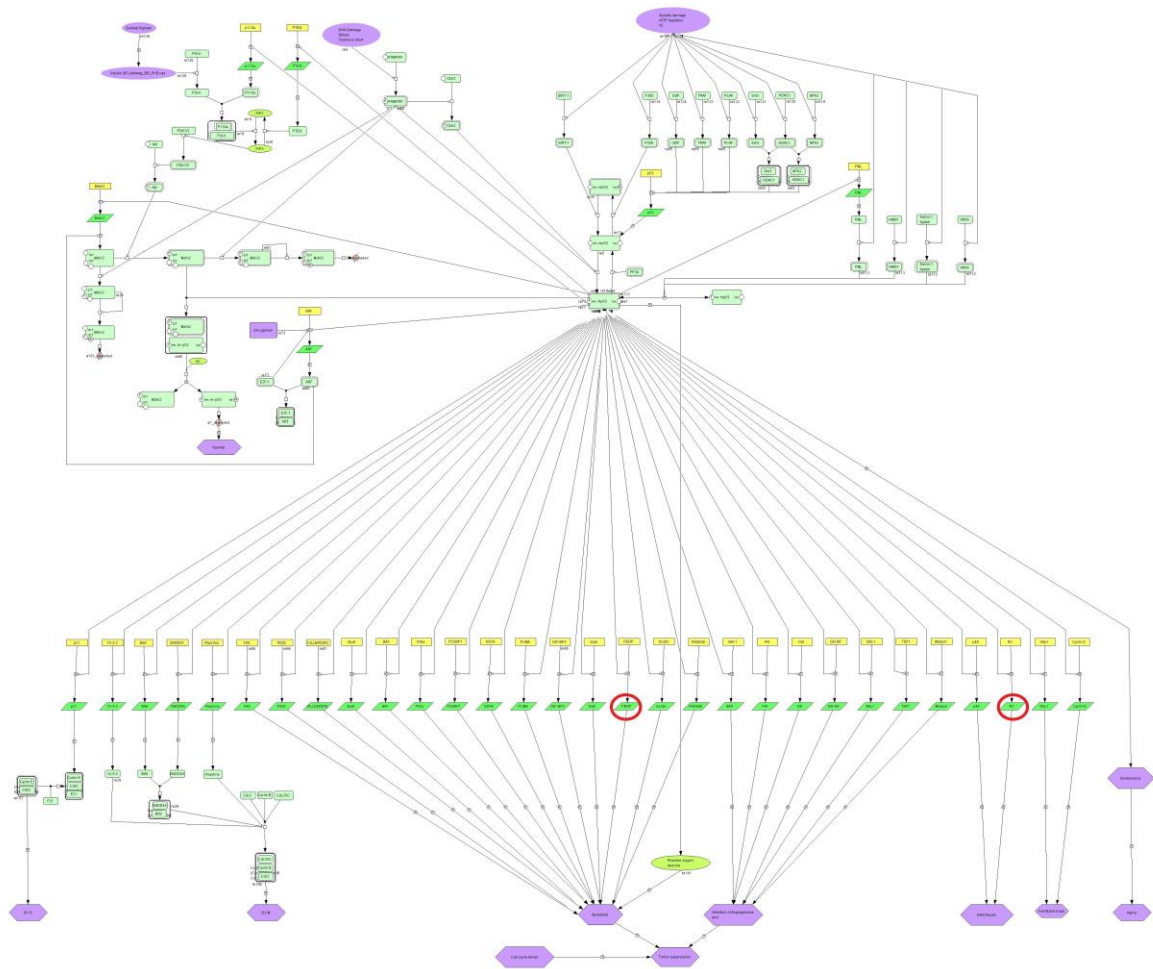

**Figure S3.** p53 signaling pathway (Panther gene set: P00059). Upregulated genes are marked with red circles

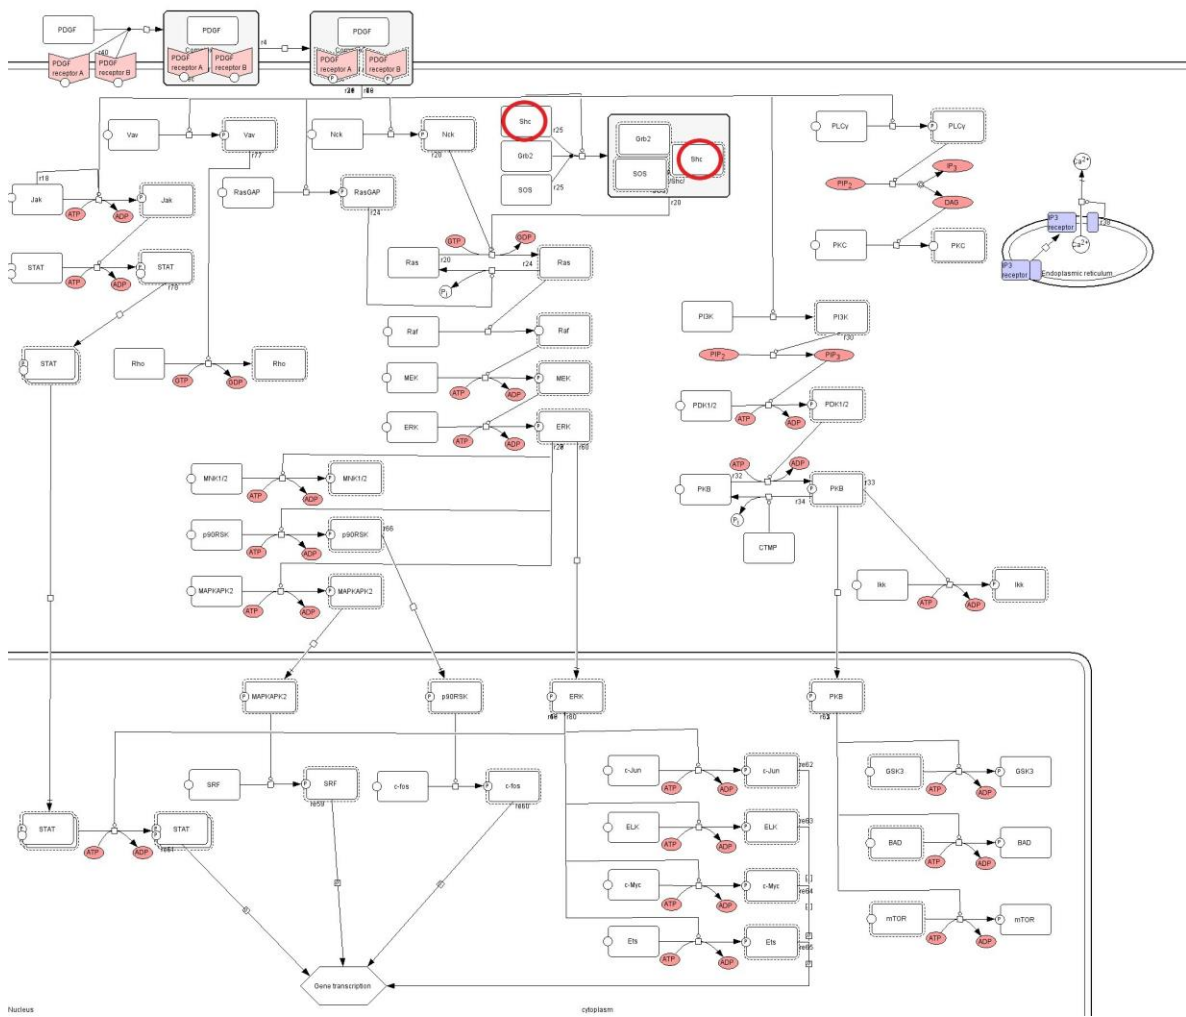

**Figure S4.** PDGF signaling pathway (Panther gene set: P00047). Upregulated genes are marked with red circles

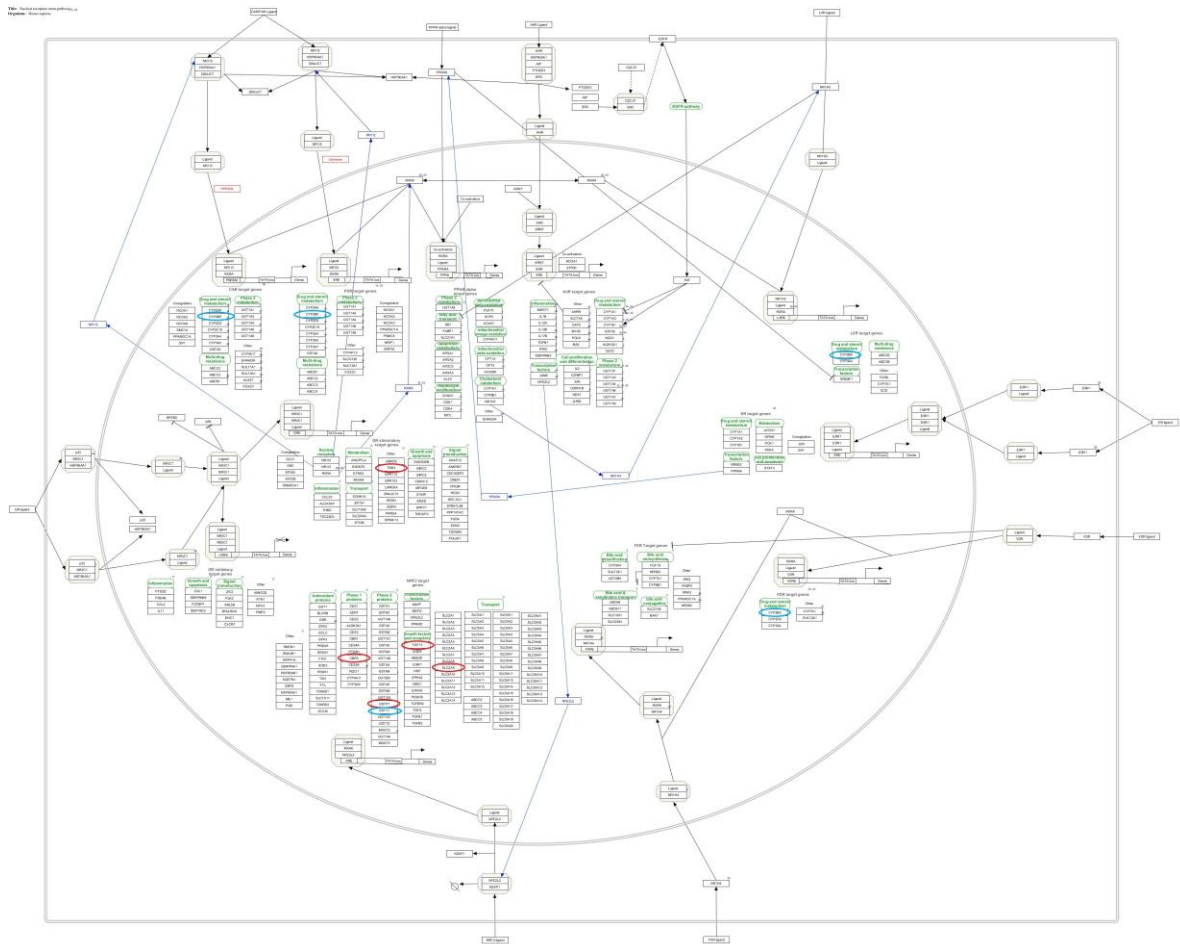

**Figure S5.** Nuclear receptors meta-pathway (Wikipathways gene set: WP2882). Upregulated genes are marked with red circles and downregulated genes with blue circles

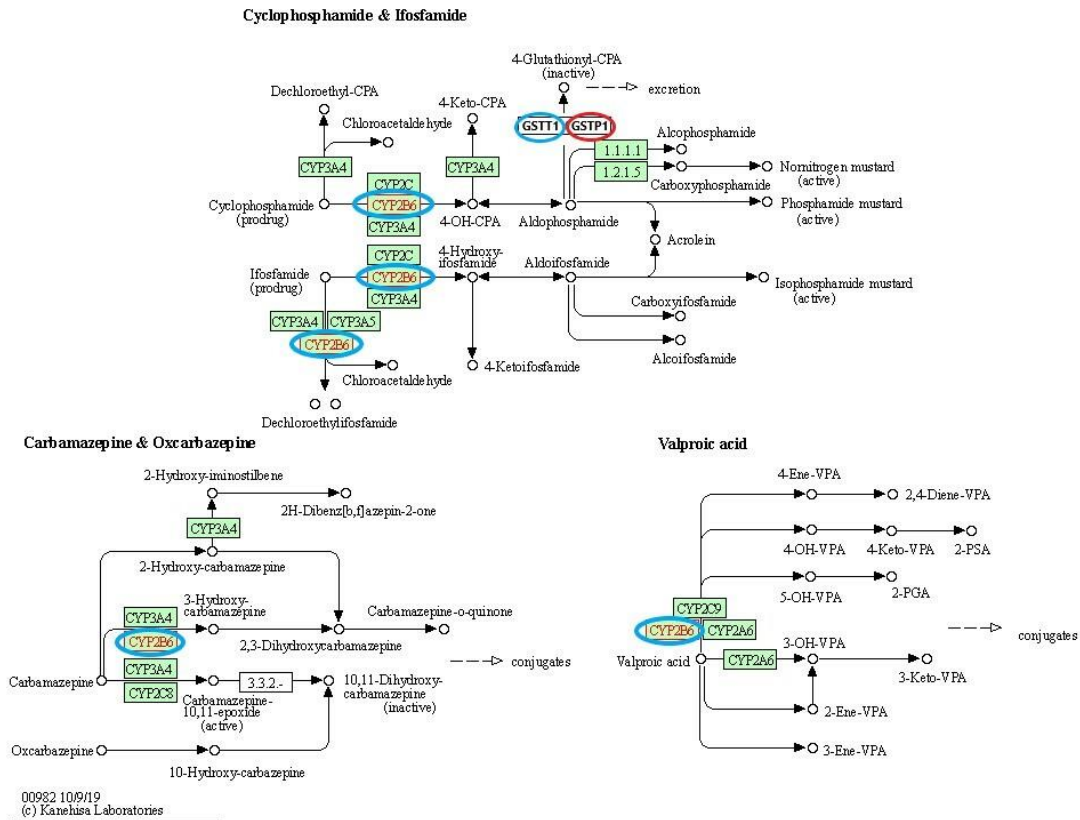

**Figure S6.** Drug metabolism pathway (Adapted KEGG gene set: hsa00982). Upregulated genes are marked with red circles and downregulated genes with blue circles

**Table S1.** - List of the 164 differentially expressed genes identified by microarray assay.

| <b>GeneSym<br/>bol.</b> | <b>Fold<br/>Change</b> | <b>Description</b>                                                                                                            |
|-------------------------|------------------------|-------------------------------------------------------------------------------------------------------------------------------|
| NKAIN1                  | -15,56                 | Homo sapiens sodium/potassium transporting ATPase interacting 1 (NKAIN1), mRNA [NM_024522]                                    |
| SERPINA3                | -6,88                  | Homo sapiens serpin family A member 3 (SERPINA3), mRNA [NM_001085]                                                            |
| TRIM58                  | -6,84                  | Homo sapiens tripartite motif containing 58 (TRIM58), mRNA [NM_015431]                                                        |
| OLFM1                   | -4,38                  | Homo sapiens olfactomedin 1 (OLFM1), transcript variant 1, mRNA [NM_014279]                                                   |
| CA2                     | -4,31                  | Homo sapiens carbonic anhydrase 2 (CA2), transcript variant 1, mRNA [NM_000067]                                               |
| TESMIN                  | -4,11                  | Homo sapiens testis expressed metallothionein like protein (TESMIN), transcript variant 1, mRNA [NM_004923]                   |
| CYP2B6                  | -3,85                  | Homo sapiens cytochrome P450 family 2 subfamily B member 6 (CYP2B6), mRNA [NM_000767]                                         |
| GATA3-<br>AS1           | -3,29                  | Homo sapiens GATA3 antisense RNA 1 (GATA3-AS1), transcript variant 2, long non-coding RNA [NR_024256]                         |
| PARD6B                  | -3,22                  | Homo sapiens par-6 family cell polarity regulator beta (PARD6B), mRNA [NM_032521]                                             |
| PREX1                   | -3,19                  | Homo sapiens phosphatidylinositol-3,4,5-trisphosphate dependent Rac exchange factor 1 (PREX1), mRNA [NM_020820]               |
| H3C10                   | -3,19                  | Homo sapiens histone cluster 1 H3 family member h (HIST1H3H), mRNA [NM_003536]                                                |
| GREB1                   | -3,12                  | Homo sapiens growth regulating estrogen receptor binding 1 (GREB1), transcript variant a, mRNA [NM_014668]                    |
| NAT1                    | -3,10                  | Homo sapiens N-acetyltransferase 1 (NAT1), transcript variant 5, mRNA [NM_000662]                                             |
| SLC16A6                 | -2,93                  | Homo sapiens solute carrier family 16 member 6 (SLC16A6), transcript variant 2, mRNA [NM_004694]                              |
| IL17RB                  | -2,90                  | Homo sapiens interleukin 17 receptor B (IL17RB), mRNA [NM_018725]                                                             |
| LRRCC1                  | -2,83                  | Homo sapiens leucine rich repeat and coiled-coil centrosomal protein 1 (LRRCC1), transcript variant 1, mRNA [NM_033402]       |
| PRRT2                   | -2,83                  | Homo sapiens proline rich transmembrane protein 2 (PRRT2), transcript variant 1, mRNA [NM_145239]                             |
| MYBL1                   | -2,83                  | Homo sapiens MYB proto-oncogene like 1 (MYBL1), transcript variant 1, mRNA [NM_001080416]                                     |
| TBC1D9                  | -2,74                  | Homo sapiens TBC1 domain family member 9 (TBC1D9), mRNA [NM_015130]                                                           |
| H3C15                   | -2,70                  | Homo sapiens histone cluster 2 H3 family member a (HIST2H3A), mRNA [NM_001005464]                                             |
| GSTT1                   | -2,69                  | Homo sapiens glutathione S-transferase theta 1 (GSTT1), transcript variant 1, mRNA [NM_000853]                                |
| JPT1                    | -2,65                  | Homo sapiens Jupiter microtubule associated homolog 1 (JPT1), transcript variant 2, mRNA [NM_001002032]                       |
| P2RY2                   | -2,61                  | Homo sapiens purinergic receptor P2Y2 (P2RY2), transcript variant 1, mRNA [NM_176072]                                         |
| RAC3                    | -2,60                  | Homo sapiens Rac family small GTPase 3 (RAC3), transcript variant 1, mRNA [NM_005052]                                         |
| E2F7                    | -2,59                  | Homo sapiens E2F transcription factor 7 (E2F7), mRNA [NM_203394]                                                              |
| LRFN4                   | -2,56                  | Homo sapiens leucine rich repeat and fibronectin type III domain containing 4 (LRFN4), transcript variant 1, mRNA [NM_024036] |
| H4C1                    | -2,54                  | Homo sapiens histone cluster 1 H4 family member a (HIST1H4A), mRNA [NM_003538]                                                |
| RSKR                    | -2,54                  | Homo sapiens ribosomal protein S6 kinase related (RSKR), mRNA [NM_001174103]                                                  |
| CDK5R1                  | -2,53                  | Homo sapiens cyclin dependent kinase 5 regulatory subunit 1 (CDK5R1), mRNA [NM_003885]                                        |
| IFT122                  | -2,52                  | Homo sapiens intraflagellar transport 122 (IFT122), transcript variant 3, mRNA [NM_018262]                                    |
| MLF1                    | -2,48                  | Homo sapiens myeloid leukemia factor 1 (MLF1), transcript variant 1, mRNA [NM_022443]                                         |
| TRPS1                   | -2,48                  | Homo sapiens transcriptional repressor GATA binding 1 (TRPS1), transcript variant 1, mRNA [NM_014112]                         |
| ATAD5                   | -2,42                  | Homo sapiens ATPase family AAA domain containing 5 (ATAD5), mRNA [NM_024857]                                                  |
| SLC9A3R1                | -2,42                  | Homo sapiens SLC9A3 regulator 1 (SLC9A3R1), mRNA [NM_004252]                                                                  |
| ZC4H2                   | -2,40                  | Homo sapiens zinc finger C4H2-type containing (ZC4H2), transcript variant 1, mRNA [NM_018684]                                 |

|            |       |                                                                                                                              |
|------------|-------|------------------------------------------------------------------------------------------------------------------------------|
| RDM1       | -2,39 | Homo sapiens RAD52 motif containing 1 (RDM1), transcript variant 2, mRNA [NM_001034836]                                      |
| KIF5C      | -2,37 | Homo sapiens kinesin family member 5C (KIF5C), transcript variant 1, mRNA [NM_004522]                                        |
| H3C2       | -2,37 | Homo sapiens histone cluster 1 H3 family member b (HIST1H3B), mRNA [NM_003537]                                               |
| SLC1A2     | -2,36 | Homo sapiens solute carrier family 1 member 2 (SLC1A2), transcript variant 1, mRNA [NM_004171]                               |
| UBE2C      | -2,35 | Homo sapiens ubiquitin conjugating enzyme E2 C (UBE2C), transcript variant 1, mRNA [NM_007019]                               |
| FAM155A    | -2,33 | family with sequence similarity 155 member A [Source:HGNC Symbol;Acc:HGNC:33877] [ENST00000375915]                           |
| C17orf58   | -2,33 | Homo sapiens chromosome 17 open reading frame 58 (C17orf58), transcript variant 1, mRNA [NM_181655]                          |
| ZNF689     | -2,31 | Homo sapiens zinc finger protein 689 (ZNF689), transcript variant 3, non-coding RNA [NR_073481]                              |
| SPAG5      | -2,28 | Homo sapiens sperm associated antigen 5 (SPAG5), mRNA [NM_006461]                                                            |
| RERG       | -2,28 | Homo sapiens RAS like estrogen regulated growth inhibitor (RERG), transcript variant 1, mRNA [NM_032918]                     |
| MBOAT1     | -2,27 | Homo sapiens membrane bound O-acyltransferase domain containing 1 (MBOAT1), transcript variant 2, non-coding RNA [NR_073465] |
| GGH        | -2,25 | Homo sapiens gamma-glutamyl hydrolase (GGH), mRNA [NM_003878]                                                                |
| PAAF1      | -2,22 | Homo sapiens proteasomal ATPase associated factor 1 (PAAF1), transcript variant 6, mRNA [NM_001363556]                       |
| GATA3      | -2,21 | Homo sapiens GATA binding protein 3 (GATA3), transcript variant 1, mRNA [NM_001002295]                                       |
| AMZ2P1     | -2,20 | Homo sapiens archaelysin family metalloproteinase 2 pseudogene 1 (AMZ2P1), non-coding RNA [NR_026903]                        |
| EMB        | -2,17 | Homo sapiens embigin (EMB), mRNA [NM_198449]                                                                                 |
| LMNTD2-AS1 | -2,15 | Homo sapiens uncharacterized LOC692247 (LOC692247), transcript variant 1, long non-coding RNA [NR_147607]                    |
| GNA13      | -2,15 | Homo sapiens G protein subunit alpha 13 (GNA13), transcript variant 1, mRNA [NM_006572]                                      |
| SERPINA11  | -2,13 | Homo sapiens serpin family A member 11 (SERPINA11), mRNA [NM_001080451]                                                      |
| CCDC106    | -2,13 | Homo sapiens coiled-coil domain containing 106 (CCDC106), transcript variant 5, mRNA [NM_001370470]                          |
| LINC02076  | -2,12 | Homo sapiens long intergenic non-protein coding RNA 2076 (LINC02076), long non-coding RNA [NR_104343]                        |
| NUMBL      | -2,11 | Homo sapiens NUMB like endocytic adaptor protein (NUMBL), transcript variant 1, mRNA [NM_004756]                             |
| RNF213     | -2,10 | Homo sapiens ring finger protein 213 (RNF213), transcript variant 2, mRNA [NM_020954]                                        |
| KLHDC9     | -2,09 | Homo sapiens kelch domain containing 9 (KLHDC9), transcript variant 2, mRNA [NM_001007255]                                   |
| SCARNA16   | -2,08 | Homo sapiens small Cajal body-specific RNA 16 (SCARNA16), guide RNA [NR_003013]                                              |
| FAM122B    | -2,08 | Homo sapiens family with sequence similarity 122B (FAM122B), transcript variant 6, mRNA [NM_001331088]                       |
| ZNF703     | -2,08 | Homo sapiens zinc finger protein 703 (ZNF703), mRNA [NM_025069]                                                              |
| COA4       | -2,07 | Homo sapiens cytochrome c oxidase assembly factor 4 homolog (COA4), mRNA [NM_016565]                                         |
| LOC644656  | -2,06 | Homo sapiens uncharacterized LOC644656 (LOC644656), long non-coding RNA [NR_036539]                                          |
| STAU2      | -2,06 | Homo sapiens staufen double-stranded RNA binding protein 2 (STAU2), transcript variant 1, mRNA [NM_001164380]                |
| RPL22L1    | -2,06 | Homo sapiens ribosomal protein L22 like 1 (RPL22L1), transcript variant 1, mRNA [NM_001099645]                               |
| NLK        | -2,06 | Homo sapiens nemo like kinase (NLK), mRNA [NM_016231]                                                                        |



|              |       |                                                                                                                            |
|--------------|-------|----------------------------------------------------------------------------------------------------------------------------|
| ATAD2        | -2,06 | Homo sapiens ATPase family AAA domain containing 2 (ATAD2), mRNA [NM_014109]                                               |
| CMSS1        | -2,06 | Homo sapiens cms1 ribosomal small subunit homolog (CMSS1), transcript variant 1, mRNA [NM_032359]                          |
| ABCA3        | -2,06 | Homo sapiens ATP binding cassette subfamily A member 3 (ABCA3), mRNA [NM_001089]                                           |
| EIF4A3       | -2,05 | Homo sapiens eukaryotic translation initiation factor 4A3 (EIF4A3), mRNA [NM_014740]                                       |
| NPAP1        | -2,05 | Homo sapiens nuclear pore associated protein 1 (NPAP1), mRNA [NM_018958]                                                   |
| FAM72B       | -2,05 | Homo sapiens family with sequence similarity 72 member B (FAM72B), transcript variant 1, mRNA [NM_001100910]               |
| ZNF814       | -2,04 | Homo sapiens zinc finger protein 814 (ZNF814), mRNA [NM_001144989]                                                         |
| C3orf14      | -2,04 | Homo sapiens chromosome 3 open reading frame 14 (C3orf14), transcript variant 1, mRNA [NM_020685]                          |
| LINC00467    | -2,01 | Homo sapiens long intergenic non-protein coding RNA 467 (LINC00467), long non-coding RNA [NR_026761]                       |
| ZHX1-C8orf76 | -2,01 | Homo sapiens ZHX1-C8orf76 readthrough (ZHX1-C8orf76), mRNA [NM_001204180]                                                  |
| NDUFAF8      | -2,00 | Homo sapiens NADH:ubiquinone oxidoreductase complex assembly factor 8 (NDUFAF8), transcript variant 3, mRNA [NM_001353403] |
| LPIN1        | 2,00  | Homo sapiens lipin 1 (LPIN1), transcript variant 1, mRNA [NM_145693]                                                       |
| FGF13        | 2,01  | Homo sapiens fibroblast growth factor 13 (FGF13), transcript variant 3, mRNA [NM_001139501]                                |
| ANO7         | 2,02  | Homo sapiens anoctamin 7 (ANO7), transcript variant NGEP-L, mRNA [NM_001001891]                                            |
| TMEM123      | 2,02  | Homo sapiens transmembrane protein 123 (TMEM123), mRNA [NM_052932]                                                         |
| YBEY         | 2,03  | Homo sapiens ybeY metalloendoribonuclease (YBEY), transcript variant 6, mRNA [NM_001314025]                                |
| SLC2A9       | 2,03  | Homo sapiens solute carrier family 2 member 9 (SLC2A9), transcript variant 2, mRNA [NM_001001290]                          |
| TSPAN11      | 2,05  | Homo sapiens tetraspanin 11 (TSPAN11), transcript variant 3, mRNA [NM_001370302]                                           |
| GFPT1        | 2,05  | Homo sapiens glutamine--fructose-6-phosphate transaminase 1 (GFPT1), transcript variant 1, mRNA [NM_001244710]             |
| ADGRG1       | 2,06  | Homo sapiens adhesion G protein-coupled receptor G1 (ADGRG1), transcript variant 3, mRNA [NM_201525]                       |
| SHC2         | 2,07  | Homo sapiens SHC adaptor protein 2 (SHC2), mRNA [NM_012435]                                                                |
| RASSF4       | 2,07  | Homo sapiens Ras association domain family member 4 (RASSF4), mRNA [NM_032023]                                             |
| COMT         | 2,07  | Homo sapiens catechol-O-methyltransferase (COMT), transcript variant 1, mRNA [NM_000754]                                   |
| TRAF3IP3     | 2,10  | Homo sapiens TRAF3 interacting protein 3 (TRAF3IP3), transcript variant 1, mRNA [NM_025228]                                |
| ANKS6        | 2,11  | Homo sapiens ankyrin repeat and sterile alpha motif domain containing 6 (ANKS6), mRNA [NM_173551]                          |
| CAMK2D       | 2,12  | Homo sapiens calcium/calmodulin dependent protein kinase II delta (CAMK2D), transcript variant 3, mRNA [NM_001221]         |
| KIF13B       | 2,13  | Homo sapiens kinesin family member 13B (KIF13B), mRNA [NM_015254]                                                          |
| ARHGAP10     | 2,13  | Rho GTPase activating protein 10 [Source:HGNC Symbol;Acc:HGNC:26099] [ENST00000507661]                                     |
| GPCPD1       | 2,13  | glycerophosphocholine phosphodiesterase 1 [Source:HGNC Symbol;Acc:HGNC:26957] [ENST00000379019]                            |
| SMPDL3A      | 2,15  | Homo sapiens sphingomyelin phosphodiesterase acid like 3A (SMPDL3A), transcript variant 1, mRNA [NM_006714]                |
| BMP7         | 2,17  | Homo sapiens bone morphogenetic protein 7 (BMP7), mRNA [NM_001719]                                                         |
| PERP         | 2,20  | Homo sapiens p53 apoptosis effector related to PMP22 (PERP), mRNA [NM_022121]                                              |
| SIRPA        | 2,20  | Homo sapiens signal regulatory protein alpha (SIRPA), transcript variant 1, mRNA [NM_001040022]                            |
| RIPK4        | 2,22  | Homo sapiens receptor interacting serine/threonine kinase 4 (RIPK4), mRNA [NM_020639]                                      |
| DGLUCY       | 2,26  | Homo sapiens D-glutamate cyclase (DGLUCY), transcript variant 3, mRNA [NM_024952]                                          |

|               |      |                                                                                                                      |
|---------------|------|----------------------------------------------------------------------------------------------------------------------|
| KIF1B         | 2,26 | Homo sapiens kinesin family member 1B (KIF1B), transcript variant 2, mRNA [NM_183416]                                |
| CBR3          | 2,26 | Homo sapiens carbonyl reductase 3 (CBR3), mRNA [NM_001236]                                                           |
| PTPRN2        | 2,27 | Homo sapiens protein tyrosine phosphatase receptor type N2 (PTPRN2), transcript variant 1, mRNA [NM_002847]          |
| ARL4A         | 2,28 | Homo sapiens ADP ribosylation factor like GTPase 4A (ARL4A), transcript variant 1, mRNA [NM_005738]                  |
| ADGRE5        | 2,28 | Homo sapiens adhesion G protein-coupled receptor E5 (ADGRE5), transcript variant 1, mRNA [NM_078481]                 |
| SRPX          | 2,28 | Homo sapiens sushi repeat containing protein X-linked (SRPX), transcript variant 1, mRNA [NM_006307]                 |
| KCNQ1         | 2,29 | Homo sapiens potassium voltage-gated channel subfamily Q member 1 (KCNQ1), transcript variant 1, mRNA [NM_000218]    |
| SLC4A11       | 2,30 | Homo sapiens solute carrier family 4 member 11 (SLC4A11), transcript variant 2, mRNA [NM_032034]                     |
| SPNS2         | 2,30 | Homo sapiens sphingolipid transporter 2 (SPNS2), mRNA [NM_001124758]                                                 |
| ADI1          | 2,30 | Homo sapiens acireductone dioxygenase 1 (ADI1), transcript variant 1, mRNA [NM_018269]                               |
| FAM20A        | 2,31 | Homo sapiens FAM20A golgi associated secretory pathway pseudokinase (FAM20A), transcript variant 1, mRNA [NM_017565] |
| TNFRSF25      | 2,32 | Homo sapiens TNF receptor superfamily member 25 (TNFRSF25), transcript variant 1, mRNA [NM_148965]                   |
| PM20D2        | 2,34 | Homo sapiens peptidase M20 domain containing 2 (PM20D2), mRNA [NM_001010853]                                         |
| RNF145        | 2,34 | Homo sapiens ring finger protein 145 (RNF145), transcript variant 2, mRNA [NM_144726]                                |
| IL7R          | 2,34 | Homo sapiens interleukin 7 receptor (IL7R), transcript variant 1, mRNA [NM_002185]                                   |
| METTL7A       | 2,35 | Homo sapiens methyltransferase like 7A (METTL7A), mRNA [NM_014033]                                                   |
| PPARGC1B      | 2,35 | Homo sapiens PPARG coactivator 1 beta (PPARGC1B), transcript variant 1, mRNA [NM_133263]                             |
| MAP1B         | 2,36 | Homo sapiens microtubule associated protein 1B (MAP1B), transcript variant 1, mRNA [NM_005909]                       |
| SH3BGRL       | 2,39 | Homo sapiens SH3 domain binding glutamate rich protein like (SH3BGRL), mRNA [NM_003022]                              |
| GRHL3         | 2,42 | Homo sapiens grainyhead like transcription factor 3 (GRHL3), transcript variant 2, mRNA [NM_198173]                  |
| CD82          | 2,43 | Homo sapiens CD82 molecule (CD82), transcript variant 1, mRNA [NM_002231]                                            |
| TACC2         | 2,43 | Homo sapiens transforming acidic coiled-coil containing protein 2 (TACC2), transcript variant 1, mRNA [NM_206862]    |
| MANBA         | 2,43 | mannosidase beta [Source:HGNC Symbol;Acc:HGNC:6831] [ENST00000505239]                                                |
| MPHOSP<br>H6  | 2,43 | Homo sapiens M-phase phosphoprotein 6 (MPHOSP6), mRNA [NM_005792]                                                    |
| GGTLC1        | 2,44 | Homo sapiens gamma-glutamyltransferase light chain 1 (GGTLC1), transcript variant B, mRNA [NM_178312]                |
| AIF1L         | 2,46 | Homo sapiens allograft inflammatory factor 1 like (AIF1L), transcript variant 1, mRNA [NM_031426]                    |
| GPM6B         | 2,47 | Homo sapiens glycoprotein M6B (GPM6B), transcript variant 1, mRNA [NM_001001995]                                     |
| HOXA3         | 2,48 | Homo sapiens homeobox A3 (HOXA3), transcript variant 2, mRNA [NM_153631]                                             |
| TACSTD2       | 2,48 | tumor associated calcium signal transducer 2 [Source:HGNC Symbol;Acc:HGNC:11530] [ENST00000371225]                   |
| C2orf72       | 2,52 | Homo sapiens chromosome 2 open reading frame 72 (C2orf72), mRNA [NM_001144994]                                       |
| KCNN4         | 2,53 | Homo sapiens potassium calcium-activated channel subfamily N member 4 (KCNN4), mRNA [NM_002250]                      |
| LOC38824<br>2 | 2,53 | Homo sapiens SAGA complex associated factor 29 pseudogene (LOC388242), non-coding RNA [NR_002556]                    |

|            |      |                                                                                                                                         |
|------------|------|-----------------------------------------------------------------------------------------------------------------------------------------|
| CDKN1C     | 2,57 | Homo sapiens cyclin dependent kinase inhibitor 1C (CDKN1C), transcript variant 1, mRNA [NM_000076]                                      |
| LRIG3      | 2,59 | Homo sapiens leucine rich repeats and immunoglobulin like domains 3 (LRIG3), transcript variant 2, mRNA [NM_153377]                     |
| VASN       | 2,70 | Homo sapiens vasorin (VASN), mRNA [NM_138440]                                                                                           |
| BEX4       | 2,71 | Homo sapiens brain expressed X-linked 4 (BEX4), transcript variant 1, mRNA [NM_001127688]                                               |
| MFSD2A     | 2,73 | Homo sapiens major facilitator superfamily domain containing 2A (MFSD2A), transcript variant 8, mRNA [NM_001349823]                     |
| ALDH1A3    | 2,78 | Homo sapiens aldehyde dehydrogenase 1 family member A3 (ALDH1A3), transcript variant 1, mRNA [NM_000693]                                |
| IRAK2      | 2,78 | Homo sapiens interleukin 1 receptor associated kinase 2 (IRAK2), mRNA [NM_001570]                                                       |
| ATP2A3     | 2,78 | Homo sapiens ATPase sarcoplasmic/endoplasmic reticulum Ca <sup>2+</sup> transporting 3 (ATP2A3), transcript variant 5, mRNA [NM_174953] |
| PON3       | 2,82 | Homo sapiens paraoxonase 3 (PON3), mRNA [NM_000940]                                                                                     |
| LONRF3     | 2,99 | PREDICTED: Homo sapiens LON peptidase N-terminal domain and ring finger 3 (LONRF3), transcript variant X6, misc_RNA [XR_001755725]      |
| TUBA4A     | 3,02 | Homo sapiens tubulin alpha 4a (TUBA4A), transcript variant 1, mRNA [NM_006000]                                                          |
| CGNL1      | 3,07 | Homo sapiens cingulin like 1 (CGNL1), transcript variant 2, mRNA [NM_032866]                                                            |
| ZNF503     | 3,08 | Homo sapiens zinc finger protein 503 (ZNF503), transcript variant 1, mRNA [NM_032772]                                                   |
| LGALS3     | 3,09 | Homo sapiens galectin 3 (LGALS3), transcript variant 1, mRNA [NM_002306]                                                                |
| ZNF503-AS2 | 3,11 | Homo sapiens ZNF503 antisense RNA 2 (ZNF503-AS2), transcript variant 5, long non-coding RNA [NR_110301]                                 |
| CD5        | 3,15 | Homo sapiens CD5 molecule (CD5), transcript variant 1, mRNA [NM_014207]                                                                 |
| SLC12A2    | 3,19 | Homo sapiens solute carrier family 12 member 2 (SLC12A2), transcript variant 1, mRNA [NM_001046]                                        |
| FAM13A     | 3,23 | Homo sapiens family with sequence similarity 13 member A (FAM13A), transcript variant 1, mRNA [NM_014883]                               |
| LIMCH1     | 3,25 | Homo sapiens LIM and calponin homology domains 1 (LIMCH1), transcript variant 1, mRNA [NM_014988]                                       |
| OGDHL      | 3,32 | Homo sapiens oxoglutarate dehydrogenase like (OGDHL), transcript variant 1, mRNA [NM_018245]                                            |
| TSPAN8     | 3,34 | Homo sapiens tetraspanin 8 (TSPAN8), transcript variant 1, mRNA [NM_004616]                                                             |
| UCHL1      | 3,49 | ubiquitin C-terminal hydrolase L1 [Source:HGNC Symbol;Acc:HGNC:12513] [ENST00000472501]                                                 |
| TNS4       | 3,54 | Homo sapiens tensin 4 (TNS4), mRNA [NM_032865]                                                                                          |
| ST6GALNAC1 | 3,71 | Homo sapiens ST6 N-acetylgalactosaminide alpha-2,6-sialyltransferase 1 (ST6GALNAC1), transcript variant 1, mRNA [NM_018414]             |
| SERHL2     | 3,73 | Homo sapiens serine hydrolase like 2 (SERHL2), transcript variant 1, mRNA [NM_014509]                                                   |
| KRBOX1     | 3,79 | Homo sapiens KRAB box domain containing 1 (KRBOX1), mRNA [NM_001205272]                                                                 |
| SLPI       | 3,81 | Homo sapiens secretory leukocyte peptidase inhibitor (SLPI), mRNA [NM_003064]                                                           |
| GSTP1      | 4,02 | Homo sapiens glutathione S-transferase pi 1 (GSTP1), mRNA [NM_000852]                                                                   |
| PSCA       | 5,49 | Homo sapiens prostate stem cell antigen (PSCA), transcript variant 1, mRNA [NM_005672]                                                  |
| MUCL1      | 5,56 | Homo sapiens mucin like 1 (MUCL1), mRNA [NM_058173]                                                                                     |
